# Supplementary material for: Development and validation of a rapid, generic measure of disease control from the patient's perspective: the IBD-Control questionnaire
Source: HighWire-hosted journal article supplement (doi:10.1136/gutjnl-2013-305600), 2013-10-09
Supplement: gutjnl-2013-305600supp.pdf [file gutjnl-2013-305600supp.pdf]

# IBD Control

Inflammatory Bowel Disease Control Questionnaire

## 1 Do you believe that:

- |                                                                                                                                                                     | Yes                      | No                       | Not sure                 |
|---------------------------------------------------------------------------------------------------------------------------------------------------------------------|--------------------------|--------------------------|--------------------------|
| a. Your IBD has been well controlled in the past two weeks?                                                                                                         | <input type="checkbox"/> | <input type="checkbox"/> | <input type="checkbox"/> |
| b. Your current treatment is useful in controlling your IBD?<br><small>(if you are not taking any treatment, please tick this box <input type="checkbox"/>)</small> | <input type="checkbox"/> | <input type="checkbox"/> | <input type="checkbox"/> |

## 2 Over the past 2 weeks, have your bowel symptoms been getting worse, getting better or not changed?

- | Better                   | No change                | Worse                    |
|--------------------------|--------------------------|--------------------------|
| <input type="checkbox"/> | <input type="checkbox"/> | <input type="checkbox"/> |

## 3 In the past 2 weeks, did you:

- |                                                                                                                                   | Yes                      | No                       | Not sure                 |
|-----------------------------------------------------------------------------------------------------------------------------------|--------------------------|--------------------------|--------------------------|
| a. Miss any planned activities because of IBD?<br><small>(e.g. attending school/college, going to work or a social event)</small> | <input type="checkbox"/> | <input type="checkbox"/> | <input type="checkbox"/> |
| b. Wake up at night because of symptoms of IBD?                                                                                   | <input type="checkbox"/> | <input type="checkbox"/> | <input type="checkbox"/> |
| c. Suffer from significant pain or discomfort?                                                                                    | <input type="checkbox"/> | <input type="checkbox"/> | <input type="checkbox"/> |
| d. Often feel lacking in energy (fatigued)<br><small>(by 'often' we mean more than half of the time)</small>                      | <input type="checkbox"/> | <input type="checkbox"/> | <input type="checkbox"/> |
| e. Feel anxious or depressed because of your IBD?                                                                                 | <input type="checkbox"/> | <input type="checkbox"/> | <input type="checkbox"/> |
| f. Think you needed a change to your treatment?                                                                                   | <input type="checkbox"/> | <input type="checkbox"/> | <input type="checkbox"/> |

## 4 At your next clinic visit, would you like to discuss:

- |                                                           | Yes                      | No                       | Not sure                 |
|-----------------------------------------------------------|--------------------------|--------------------------|--------------------------|
| a. Alternative types of drug for controlling IBD          | <input type="checkbox"/> | <input type="checkbox"/> | <input type="checkbox"/> |
| b. Ways to adjust your own treatment                      | <input type="checkbox"/> | <input type="checkbox"/> | <input type="checkbox"/> |
| c. Side effects or difficulties with using your medicines | <input type="checkbox"/> | <input type="checkbox"/> | <input type="checkbox"/> |
| d. New symptoms that have developed since your last visit | <input type="checkbox"/> | <input type="checkbox"/> | <input type="checkbox"/> |

## 5 How would you rate the OVERALL control of your IBD in the past two weeks?

Please draw a vertical line (|) on the scale below

|                              |                                                                                      |                  |
|------------------------------|--------------------------------------------------------------------------------------|------------------|
| Worst<br>possible<br>control |  | Best<br>possible |
|------------------------------|--------------------------------------------------------------------------------------|------------------|
